# Supplementary material for: Reduction in the Incidence Density of Pressure Injuries in Intensive Care Units after Advance Preventive Protocols
Source: MDPI journal article supplement (doi:10.3390/healthcare11152116), 2023-07-25
Supplement: s1 [file s1]

Table S1. The cases of different sites of non-iatrogenic and iatrogenic pressure injuries.

| Non-iatrogenic PrIs          | 2014 | 2015 | 2016 | Pre-bundle<br>stage | 2017 | 2018 | 2019 | Post-bundle<br>stage | <i>p</i> |
|------------------------------|------|------|------|---------------------|------|------|------|----------------------|----------|
| Sacrum                       | 17   | 38   | 23   | 78                  | 5    | 5    | 3    | 13                   | <0.001   |
| Ischium                      | 32   | 11   | 2    | 45                  | 0    | 1    | 0    | 1                    |          |
| back                         | 5    | 5    | 3    | 13                  | 1    | 2    | 2    | 5                    |          |
| Knee/Hip/Shoulder            | 4    | 4    | 3    | 11                  | 0    | 0    | 1    | 1                    |          |
| Ankle                        | 5    | 7    | 2    | 14                  | 2    | 1    | 1    | 4                    |          |
| Heel                         | 7    | 23   | 11   | 41                  | 1    | 2    | 0    | 3                    |          |
| Occiput                      | 4    | 2    | 0    | 6                   | 0    | 0    | 0    | 0                    |          |
| Total non-iatrogenic<br>PrIs | 74   | 90   | 44   | 208                 | 9    | 11   | 7    | 27                   |          |
| Iatrogenic PrIs              | 2014 | 2015 | 2016 |                     | 2017 | 2018 | 2019 |                      | <i>p</i> |
| Auricle                      | 10   | 8    | 3    | 21                  | 3    | 5    | 0    | 8                    | 0.001    |
| Nasal wings                  | 4    | 4    | 13   | 21                  | 10   | 2    | 1    | 13                   |          |
| Nasal bridge                 | 7    | 7    | 3    | 17                  | 1    | 1    | 0    | 2                    |          |
| Face                         | 7    | 8    | 1    | 16                  | 3    | 0    | 1    | 4                    |          |
| Finger/Elbow/Arm             | 4    | 4    | 1    | 9                   | 2    | 0    | 3    | 5                    |          |
| Total iatrogenic PrIs        | 32   | 31   | 21   | 84                  | 19   | 8    | 5    | 32                   |          |

PrIs: pressure injuries.
